# Supplementary material for: Transcriptome analysis of Globodera pallida from the susceptible host Solanum tuberosum or the resistant plant Solanum sisymbriifolium
Source: PubMed Central journal article supplement (PMC6744408; doi:10.1038/s41598-019-49725-6), 2019-09-13
Supplement: 41598_2019_49725_MOESM1_ESM.pdf [file 41598_2019_49725_MOESM1_ESM.pdf]

Transcriptome analysis of *Globodera pallida* from the susceptible host *Solanum tuberosum*  
or the resistant plant *Solanum sisymbriifolium*

Rinu Kooliyottil, Louise-Marie Dandurand, Joseph C Kuhl, Allan Caplan, Fangming Xiao,  
Benjamin Mimee, and Joël Lafond-Lapalme

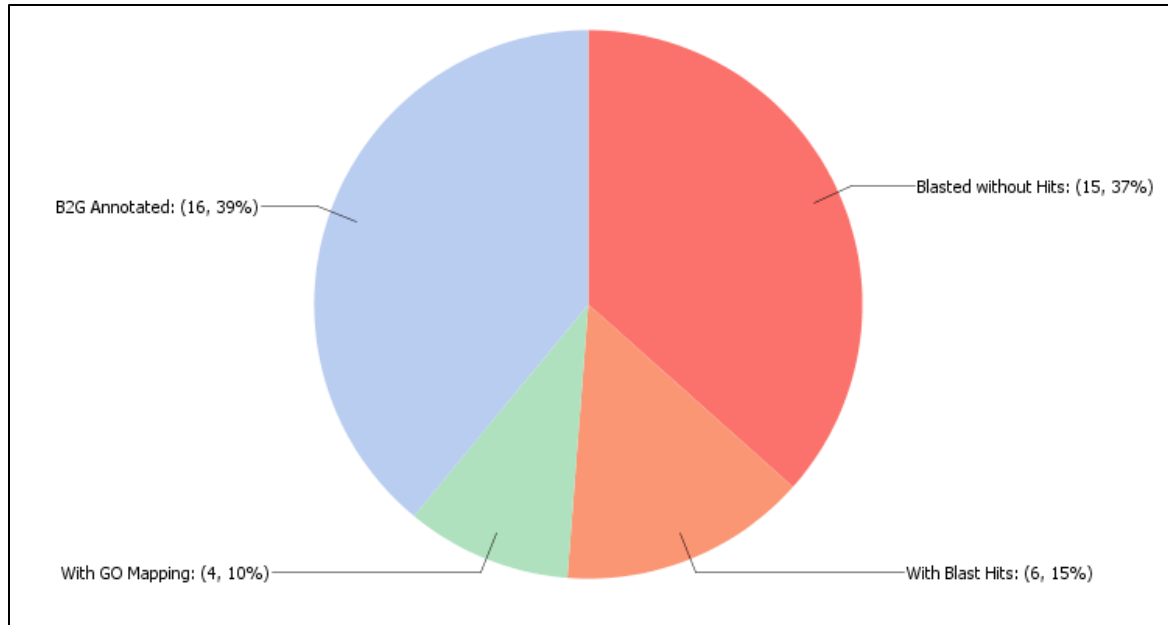

Fig. S1. BLAST statistics of the 41 differentially expressed genes of *Globodera pallida* isolated from *Solanum tuberosum* and *Solanum sisymbriifolium* 24 h post infestation.

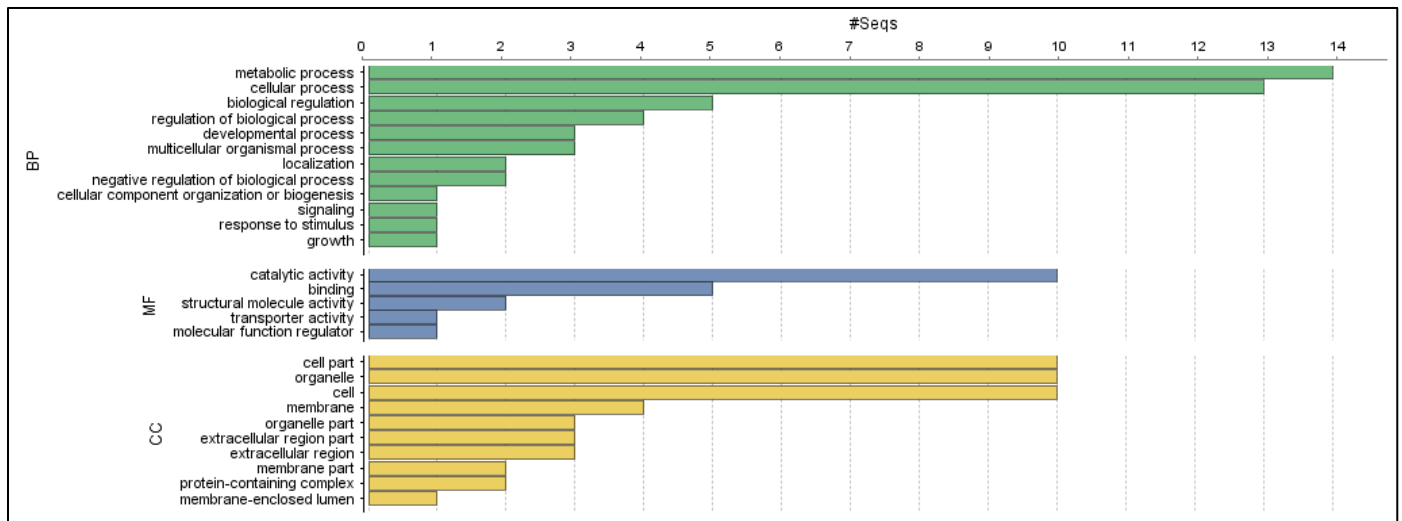

Fig. S2. Distribution of GO annotation terms for biological process (BP), molecular function (MF) and cell compartment (CC) in the differentially expressed genes of *Globodera pallida* isolated from *Solanum tuberosum* and *Solanum sisymbriifolium* 24 h post infestation.

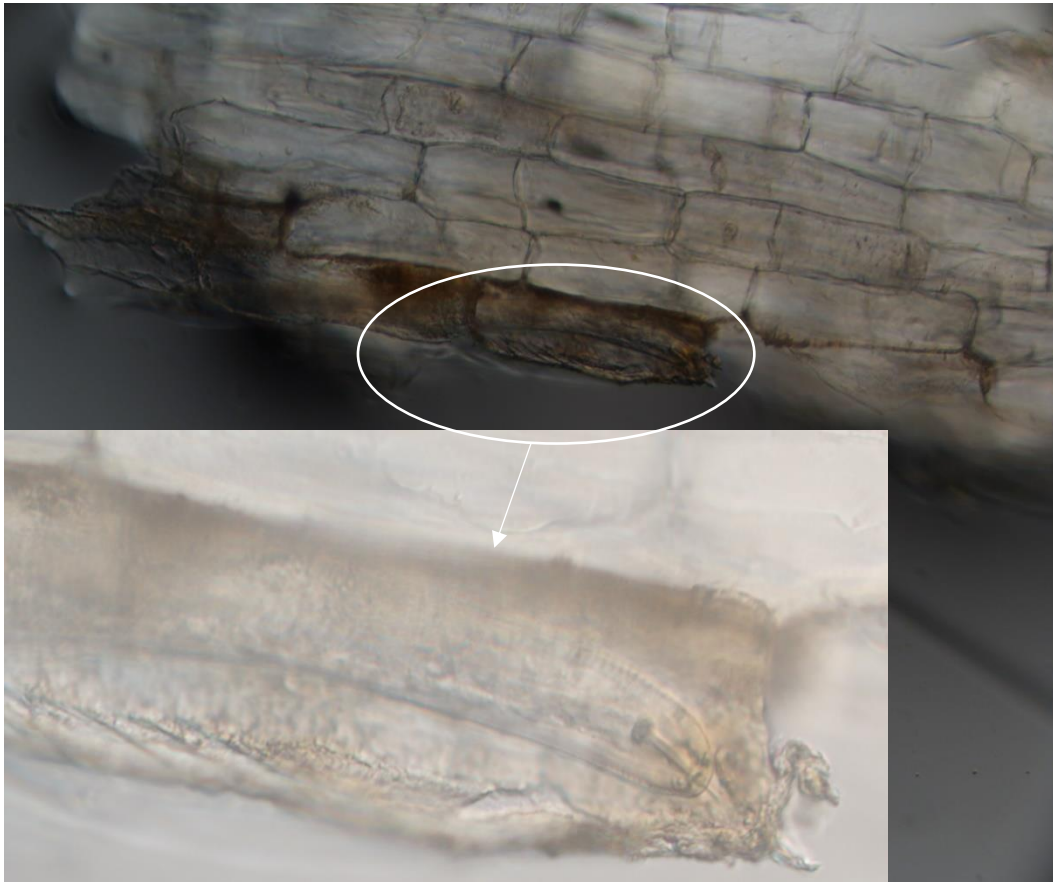

Fig. S3. *Globodera pallida* invading a root cell of *Solanum sisymbriifolium*.

```

1      10      20      30      40      50      60      70      80      90      100     110     120     130
|-----|-----|-----|-----|-----|-----|-----|-----|-----|-----|-----|-----|
Rbp-4  LFFFIFVHYFRVLPVSSVFLFQLGLFCSCSILEFRTEQEQSKIVGTKHSRLILLKNNSIIFPYFSPFRAPLSNSFLMHQFAEAEFCPSFVPTFYSLVLTAPKNCLVSLVHVLIAKKMYLMVPIFLL
Rbp-1
Consensus  .....

131     140     150     160     170     180     190     200     210     220     230     240     250     260
|-----|-----|-----|-----|-----|-----|-----|-----|-----|-----|-----|-----|
Rbp-4  FVFILSPISPAFFFDPSDFPKNSGPIQLNLKIKHQQPMPFKPTSIVALSAFERAFCCSEFAACFFSSPLSLSNNAFSLCNSHFCLNSETTTDWTDFSRKSSSSFFCLCSKSLIYVWTRDMSHEISFC
Rbp-1  FVFILSPISPAFFFDPSDFPKNSGPIQLNLKIKHQQPMPFKPTSIVALSAFERAFCCSEFAACFFSSPLSLSNNAFSLCNSHFCLNSETTTDWTDFSRKSSSSFFCLCSKSLIYVWTRDMSHEISFC
Consensus  .....nrcicfkg!flltadn!$Eidacp

261     270     280     290     300     310     320     330     340     350     360     370     380     390
|-----|-----|-----|-----|-----|-----|-----|-----|-----|-----|-----|-----|
Rbp-4  SFNQSIILSLVSMCCCLKASIFCCSFISSIKFLAFDSFMSRLLCCCLFYCSI-FVCRALWIRSFCSNSARSVFTNGHKDFLLENIFTFSSSFVILFHSSICSRILPANSSCSSFTPSILLRF
Rbp-1  KPNKKVYKGSSSSGNAEPNGGLTLQHQNPACDTCCLTSETERRLMIVEYTKADWACDTCCLTL---SETERLMIAEHTKADHGCRSVFAVESIP---NQESGIFYEYVKISAITASVSI
Consensus  kfNqk!lkgSfscnaInagifccnqinpeacdacds!SeseRrcccleYcka,faCraclai....S#saRlnia#gnKaDfgcrn!FafeSip.....nqcSrILpa#skeSaiTa$!lirIaf

391     400     410     420     430     440     450     460     470     480     490     500     510     520
|-----|-----|-----|-----|-----|-----|-----|-----|-----|-----|-----|-----|
Rbp-4  AIKSKPALGEVGLIYCHRSNMAIILAKRRNSLDGFIILNYSKIPNFSFNDVLFKIFPVADIDIFWDAGE SIRILCAKPLKEWAGSARIDSEERDSXCFLEFVSAYDFSKNPGPPHQLKFLIIFLYFPP
Rbp-1  EMPLDKFVGYV-KGTYSYDSRGYFAGHEVAGCSHLNKHFPVKVPKFGEGOVVGCNVLEKRQIFYTLNGE-----LLEPAGLPI-DHDAFLPCITVYAPGTKEANFGPEFHPKSAQVIEIKNE
Consensus  aikldka!GeV.KgiycwRrgailaHerancldgnih%K!PnFgendVlqcg!nlear#Ii%tdaGE.....LLEpAGLaI.Dh#ardfpCilt%apatdieanFGPefHqkad!IeIlkne

521     530     540     550     560     570     580     590     600     610     620     630     640     650
|-----|-----|-----|-----|-----|-----|-----|-----|-----|-----|-----|-----|
Rbp-4  FQAPFSNSFLMHQFAEAEFCPSFVPTFYSLVLTGPKCCSVSLRVHLIAKKLYLVNPTFCYICLYFYSISPDDFFDPSAFFKFKFALLTHLINHCNQCFLISLLFCIRRLLLLKSFQCHLYTLQLV
Rbp-1  NL
Consensus  nq.....

651  657
|-----|
Rbp-4  LSQFGNY
Rbp-1
Consensus  .....

```

Fig. S4. Protein sequence similarity between Rbp-4 and Rbp-1 (ACJ14490.1 RBP1

[*Globodera pallida*]

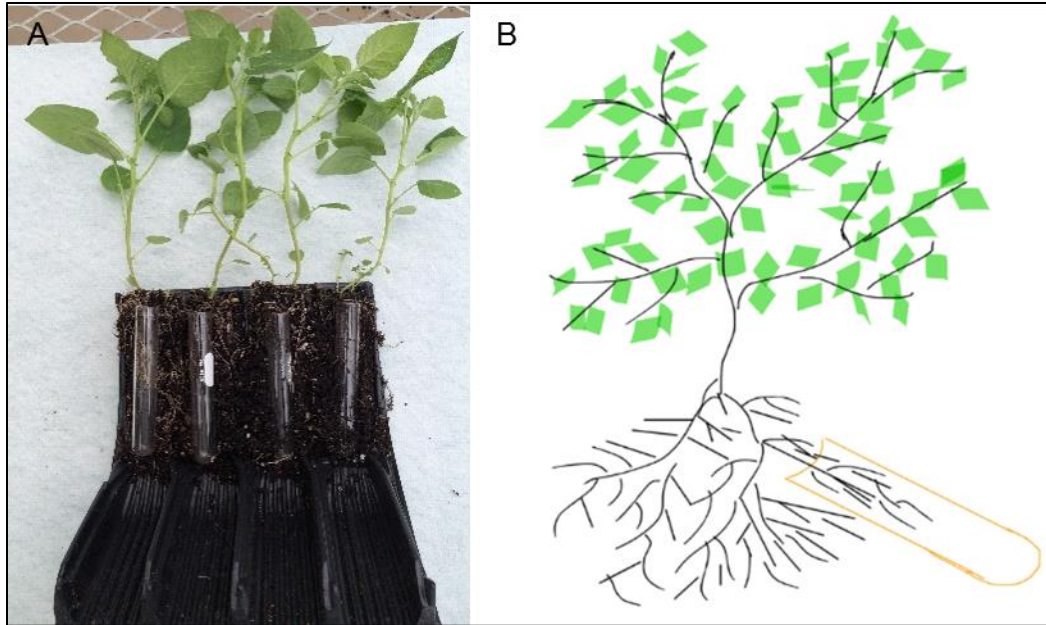

Fig. S5. Single root inoculation technique used for *Globodera pallida* infection. A, *Solanum tuberosum* growing in root trainers, a single root was transferred to the glass tube prior to inoculating with *G. pallida*; B, Prototype of single root inoculation used in the present study.

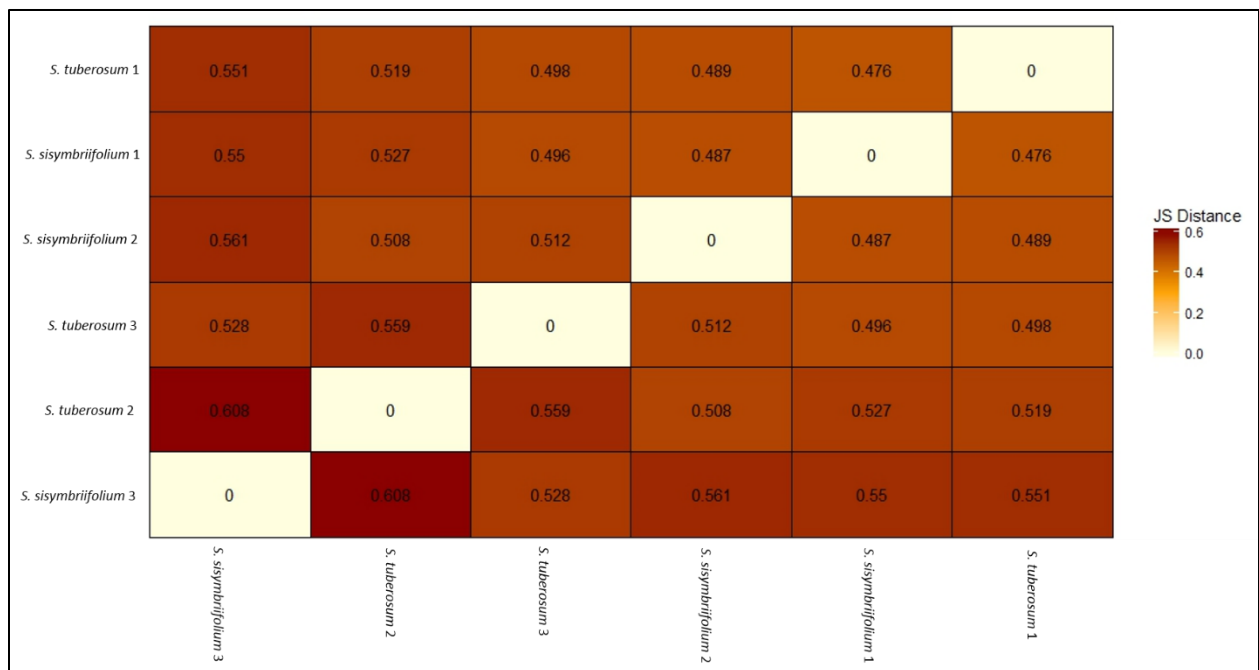

Fig. S6. Distance matrix showing insight into the relationship between the samples from susceptible *Solanum tuberosum* and resistant *Solanum sisymbriifolium* with three biological replicates. The color scale given on the right represents the distance between different samples.
